# Supplementary material for: Trinuclear NiII-LnIII-NiII Complexes with Schiff Base Ligands: Synthesis, Structure, and Magnetic Properties
Source: MDPI journal article supplement (doi:10.3390/molecules25102280), 2020-05-12
Supplement: s1 [file s1]

Supplementary material

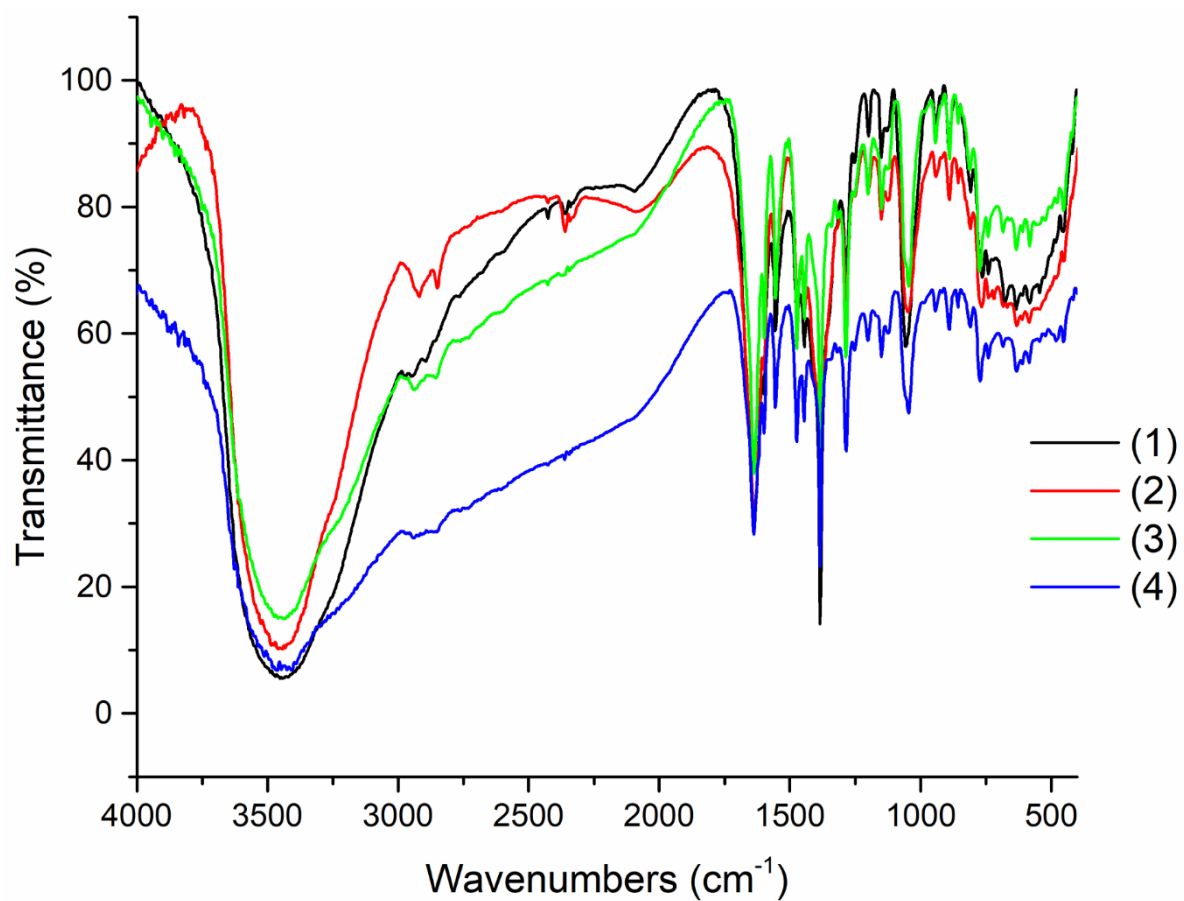

Figure S1. The FT-IR spectra of complexes 1-4.

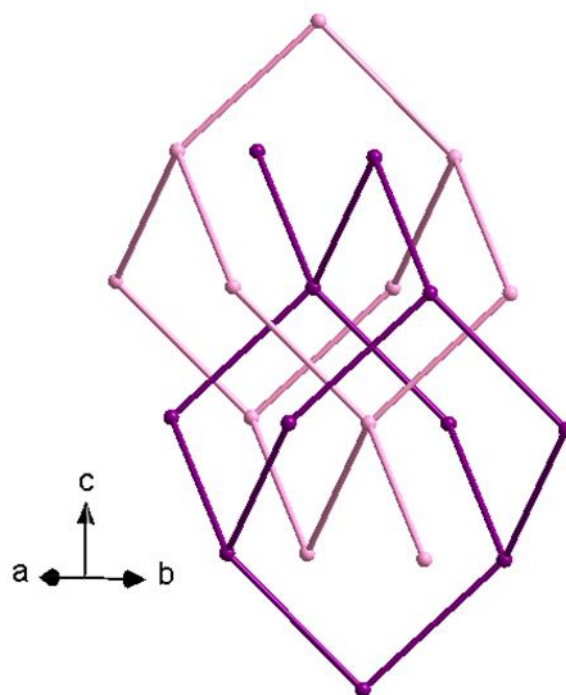

Figure S1. The characteristic interpenetrating adamantane units of the two independent diamondlike lattices [49] in the structure of compound 4.
